# Supplementary material
Source: PubMed Central journal article supplement (PMC3740937)
Supplement: NIHMS490419-supplement-supplemental_data.pdf [file NIHMS490419-supplement-supplemental_data.pdf]

CLOSE

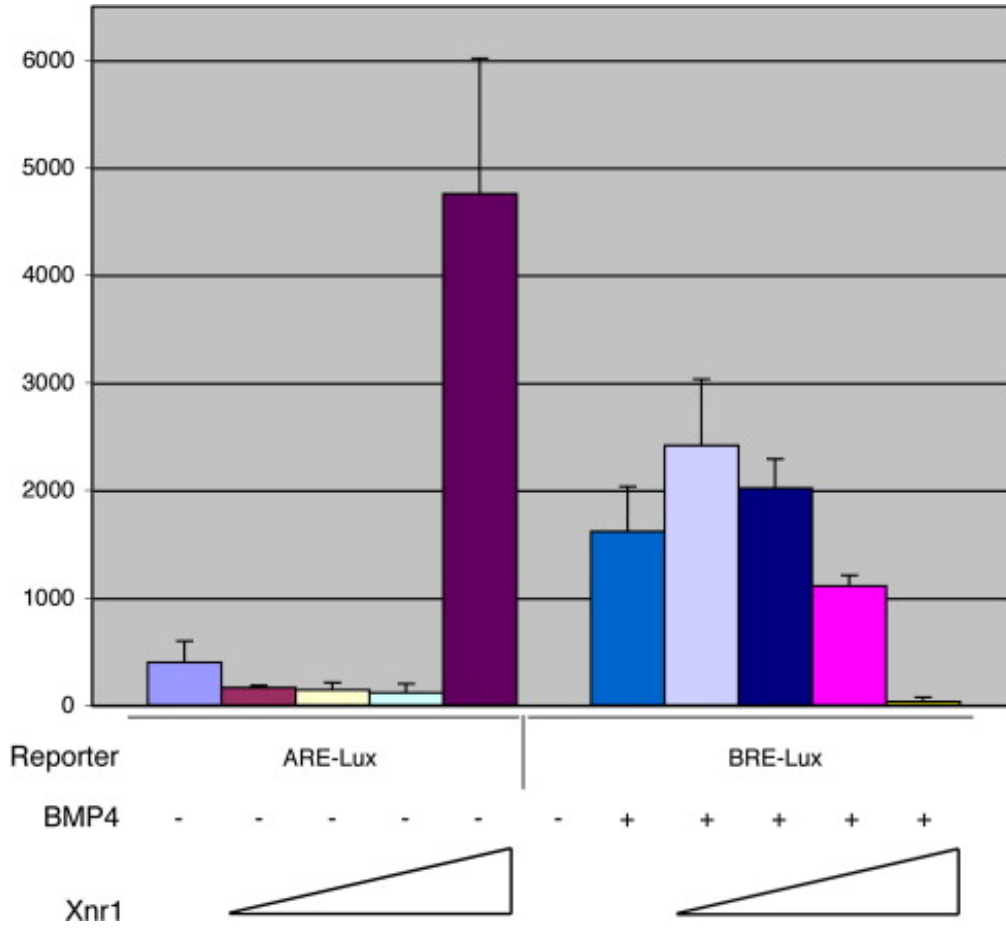

Supplemental Fig. 1. Xnr1 activates Nodal signaling but does not inhibit BMP signaling at low doses.
